# Supplementary material for: Enhancing Safety in Regional Anesthesia: Guidelines from the Italian Society of Anesthesia, Analgesia, Resuscitation and Intensive Care (SIAARTI)
Source: Springer Nature journal article supplement (doi:10.1186/s44158-025-00245-y), 2025-05-14
Supplement: MOESM1 [file 44158_2025_245_MOESM1_ESM.pdf]

Supplementary Digital Content 1 : Forest Plots and Risk of bias analysis

PICO 1 - *Is it safe to perform a central neuraxial block in patients on cardioaspirin therapy?*

Forest plot PICO 1

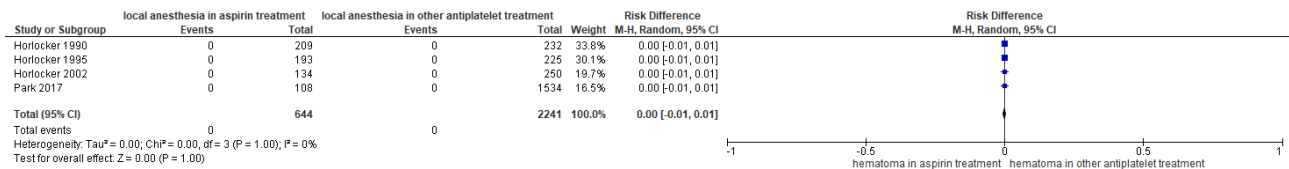

Risk of bias – PICO 1

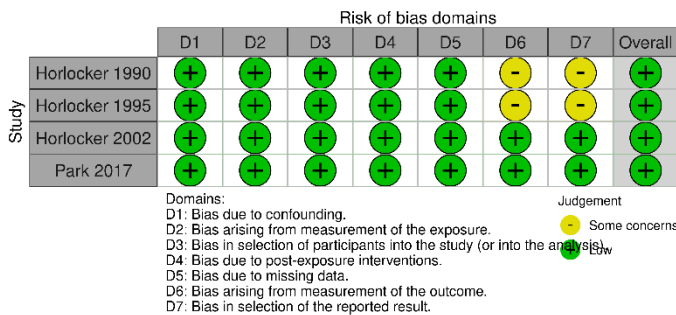

**PICO 2 - Does the combined use of ultrasound and nerve stimulation (ENS) in peripheral nerve blocks with a motor component in adult patients increase the efficacy and safety of surgical blocks, reducing neurological and nerve damage?**

**Forest plot PICO 2**

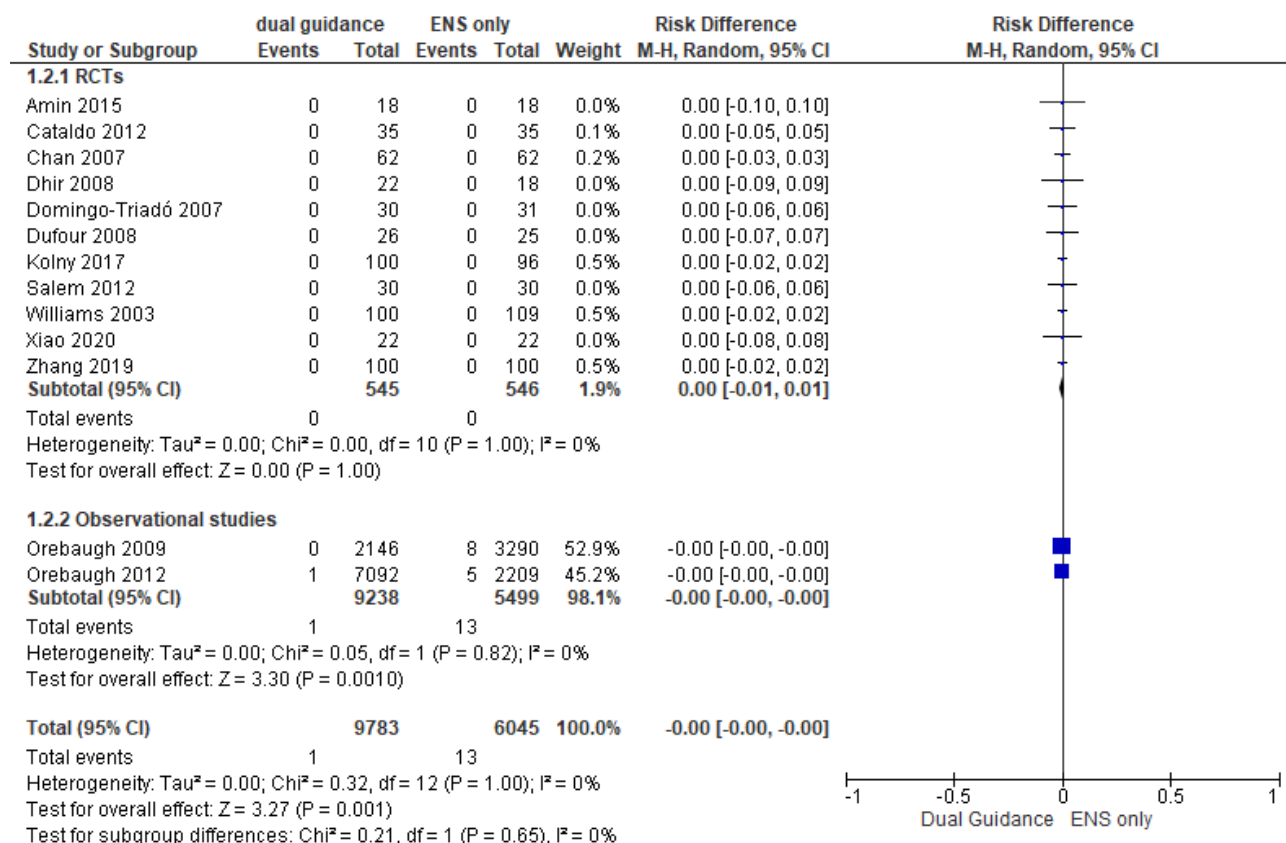

**Risk of bias – PICO 2**

|                     | Risk of bias domains |    |    |    |    |         |
|---------------------|----------------------|----|----|----|----|---------|
|                     | D1                   | D2 | D3 | D4 | D5 | Overall |
| Amin 2015           | ⊖                    | ⊕  | ⊖  | ⊕  | ⊕  | ⊕       |
| Cataldo 2012        | ⊖                    | ⊕  | ⊕  | ⊕  | ⊕  | ⊕       |
| Chan 2007           | ⊖                    | ⊕  | ⊖  | ⊕  | ⊕  | ⊖       |
| Dhir 2008           | ⊖                    | ⊕  | ⊕  | ⊕  | ⊖  | ⊕       |
| Domingo-Triadó 2007 | ⊗                    | ⊖  | ⊕  | ⊕  | ⊖  | ⊕       |
| Dufour 2008         | ⊗                    | ⊕  | ⊖  | ⊕  | ⊕  | ⊕       |
| Kolny 2017          | ⊗                    | ⊖  | ⊖  | ⊖  | ⊕  | ⊖       |
| Salem 2012          | ⊗                    | ⊕  | ⊕  | ⊕  | ⊕  | ⊕       |
| Williams 2003       | ⊗                    | ⊕  | ⊕  | ⊕  | ⊕  | ⊕       |
| Xiao 2020           | ⊗                    | ⊕  | ⊕  | ⊖  | ⊖  | ⊕       |
| Zhang 2019          | ⊕                    | ⊕  | ⊖  | ⊕  | ⊕  | ⊕       |

Domains:  
D1: Bias arising from the randomization process.  
D2: Bias due to deviations from intended intervention.  
D3: Bias due to missing outcome data.  
D4: Bias in measurement of the outcome.  
D5: Bias in selection of the reported result.

Judgement  
⊗ High  
⊖ Some concerns  
⊕ Low

|       |               | Risk of bias domains |    |    |    |    |    |    |         |
|-------|---------------|----------------------|----|----|----|----|----|----|---------|
|       |               | D1                   | D2 | D3 | D4 | D5 | D6 | D7 | Overall |
| Study | Orebaugh 2009 | ⊕                    | ⊕  | ⊕  | ⊖  | ⊕  | ⊖  | ⊖  | ⊖       |
|       | Orebaugh 2012 | ⊖                    | ⊕  | ⊕  | ⊕  | ⊕  | ⊖  | ⊕  | ⊕       |

Domains:

D1: Bias due to confounding.  
D2: Bias arising from measurement of the exposure.  
D3: Bias in selection of participants into the study (or into the analysis).  
D4: Bias due to post-exposure interventions.  
D5: Bias due to missing data.  
D6: Bias arising from measurement of the outcome.  
D7: Bias in selection of the reported result.

Judgement

⊖ Some concerns  
⊕ Low

**PICO 3 - Is the use of ultrasound-guided peripheral block techniques safe in adult patients taking Direct Oral Anticoagulants (DOAC) ?**

**Risk of bias – PICO 3**

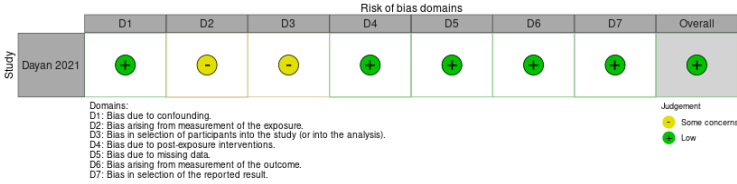

## PICO 4 - Can the use of ultrasound-guided techniques increase safety in nerve block procedures on adult patients?

### Forest plot PICO 4

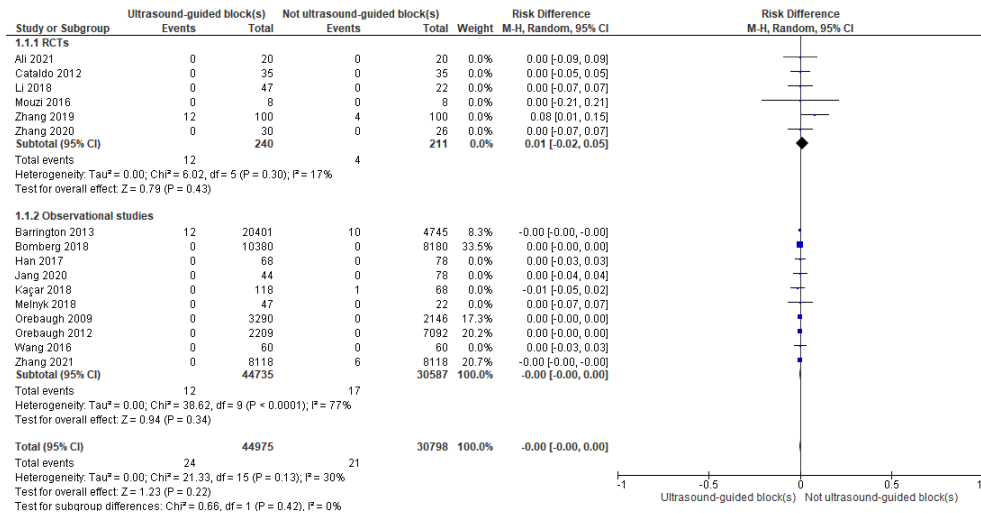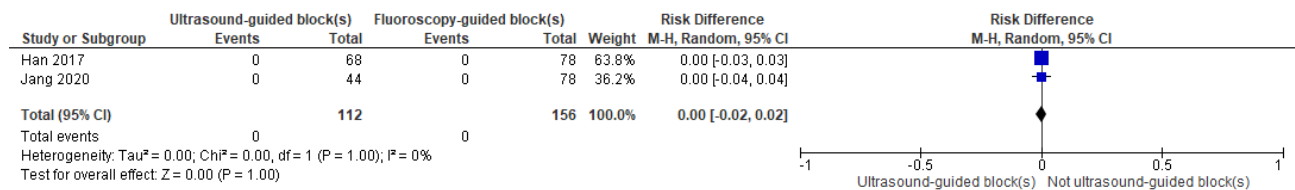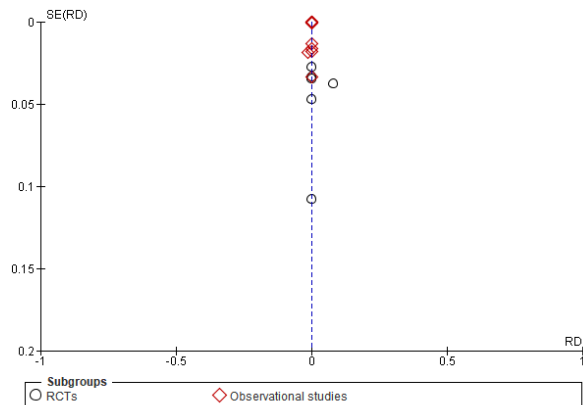

### Risk of bias – PICO 4

| Study        | Risk of bias domains |     |     |     |     |         |
|--------------|----------------------|-----|-----|-----|-----|---------|
|              | D1                   | D2  | D3  | D4  | D5  | Overall |
| Ali 2021     | High                 | Low | Low | Low | Low | Low     |
| Cataldo 2012 | Low                  | Low | Low | Low | Low | Low     |
| Li 2018      | No information       | Low | Low | Low | Low | Low     |
| Mouzi 2016   | No information       | Low | Low | Low | Low | Low     |
| Zhang 2019   | Low                  | Low | Low | Low | Low | Low     |
| Zhang 2020   | Low                  | Low | Low | Low | Low | Low     |

Domains:  
D1: Bias arising from the randomization process.  
D2: Bias due to deviations from intended intervention.  
D3: Bias due to missing outcome data.  
D4: Bias in measurement of the outcome.  
D5: Bias in selection of the reported result.

Judgement  
High  
Some concerns  
Low  
No information

| Study           | Risk of bias domains |     |     |     |     |     |         |
|-----------------|----------------------|-----|-----|-----|-----|-----|---------|
|                 | D1                   | D2  | D3  | D4  | D5  | D6  | Overall |
| Barrington 2013 | Low                  | Low | Low | Low | Low | Low | Low     |
| Bomberg 2018    | Low                  | Low | Low | Low | Low | Low | Low     |
| Han 2017        | Low                  | Low | Low | Low | Low | Low | Low     |
| Jang 2020       | Low                  | Low | Low | Low | Low | Low | Low     |
| Kacar 2018      | Low                  | Low | Low | Low | Low | Low | Low     |
| Melnik 2018     | Low                  | Low | Low | Low | Low | Low | Low     |
| Orebaugh 2009   | Low                  | Low | Low | Low | Low | Low | Low     |
| Orebaugh 2012   | Low                  | Low | Low | Low | Low | Low | Low     |
| Wang 2016       | Low                  | Low | Low | Low | Low | Low | Low     |
| Zhang 2021      | Low                  | Low | Low | Low | Low | Low | Low     |

Domains:  
D1: Bias due to confounding.  
D2: Bias arising from measurement of the exposure.  
D3: Bias in selection of participants into the study (or into the analysis).  
D4: Bias due to post-exposure interventions.  
D5: Bias due to missing data.  
D6: Bias arising from measurement of the outcome.  
D7: Bias in selection of the reported result.

Judgement  
High  
Some concerns  
Low

**PICO 5- Can a sterile surgical field (using disinfectants, covers, gloves, and sterile drapes) setup for the execution of neuraxial techniques, help reduce the occurrence of infections related to the technique itself?**

#### Risk of bias – PICO 5

|       |               | Risk of bias domains |    |    |    |    |         |
|-------|---------------|----------------------|----|----|----|----|---------|
|       |               | D1                   | D2 | D3 | D4 | D5 | Overall |
| Study | Birnback 2003 |                      |    |    |    |    |         |
|       | Kasuda 2002   |                      |    |    |    |    |         |
|       | Robins 2005   |                      |    |    |    |    |         |

Domains:  
D1: Bias arising from the randomization process.  
D2: Bias due to deviations from intended intervention.  
D3: Bias due to missing outcome data.  
D4: Bias in measurement of the outcome.  
D5: Bias in selection of the reported result.

Judgement  
 High  
 Some concerns  
 Low

|       |             | Risk of bias domains                                                                                                                                                                                                                                                                                                                                                  |    |    |    |    |    |    |                                           |
|-------|-------------|-----------------------------------------------------------------------------------------------------------------------------------------------------------------------------------------------------------------------------------------------------------------------------------------------------------------------------------------------------------------------|----|----|----|----|----|----|-------------------------------------------|
|       |             | D1                                                                                                                                                                                                                                                                                                                                                                    | D2 | D3 | D4 | D5 | D6 | D7 | Overall                                   |
| Study | Kerest 2015 |                                                                                                                                                                                                                                                                                                                                                                       |    |    |    |    |    |    |                                           |
|       |             | Domains:<br>D1: Bias due to confounding.<br>D2: Bias arising from measurement of the exposure.<br>D3: Bias in selection of participants into the study (or into the analysis).<br>D4: Bias due to post-exposure interventions.<br>D5: Bias due to missing data.<br>D6: Bias arising from measurement of the outcome.<br>D7: Bias in selection of the reported result. |    |    |    |    |    |    | Judgement<br>High<br>Some concerns<br>Low |

**PICO 6 - In adult patients (≥18 years) undergoing continuous peripheral loco-regional techniques, the preparation of a sterile surgical field (using disinfectant, covers, gloves, drapes, and mask) for the procedure is suggested to reduce the occurrence of infections and ensure patient and procedural safety.**

#### Risk of bias – PICO 6

|       |              | Risk of bias domains                                                                                                                                                                                                                                        |    |    |    |    |                                   |
|-------|--------------|-------------------------------------------------------------------------------------------------------------------------------------------------------------------------------------------------------------------------------------------------------------|----|----|----|----|-----------------------------------|
|       |              | D1                                                                                                                                                                                                                                                          | D2 | D3 | D4 | D5 | Overall                           |
| Study | Harkouk 2021 |                                                                                                                                                                                                                                                             |    |    |    |    |                                   |
|       |              | Domains:<br>D1: Bias arising from the randomization process.<br>D2: Bias due to deviations from intended intervention.<br>D3: Bias due to missing outcome data.<br>D4: Bias in measurement of the outcome.<br>D5: Bias in selection of the reported result. |    |    |    |    | Judgement<br>Some concerns<br>Low |

|       |             | Risk of bias domains                                                                                                                                                                                                                                                                                                                                                  |    |    |    |    |    |    |                                           |
|-------|-------------|-----------------------------------------------------------------------------------------------------------------------------------------------------------------------------------------------------------------------------------------------------------------------------------------------------------------------------------------------------------------------|----|----|----|----|----|----|-------------------------------------------|
|       |             | D1                                                                                                                                                                                                                                                                                                                                                                    | D2 | D3 | D4 | D5 | D6 | D7 | Overall                                   |
| Study | Kerest 2015 |                                                                                                                                                                                                                                                                                                                                                                       |    |    |    |    |    |    |                                           |
|       |             | Domains:<br>D1: Bias due to confounding.<br>D2: Bias arising from measurement of the exposure.<br>D3: Bias in selection of participants into the study (or into the analysis).<br>D4: Bias due to post-exposure interventions.<br>D5: Bias due to missing data.<br>D6: Bias arising from measurement of the outcome.<br>D7: Bias in selection of the reported result. |    |    |    |    |    |    | Judgement<br>High<br>Some concerns<br>Low |

**PICO 7 - Is the use of antiplatelet drugs safe for patients undergoing an ultrasound + ENS guided (dual guidance) peripheral nerve block?**

**PICO 8 - *Is it safe to perform peripheral nerve block techniques with ultrasound guidance and nerve stimulation (dual guidance) in adult patients on anticoagulant therapy?***

**PICO 9 - *Can the use of infusion pressure monitoring techniques, during the performance of peripheral blocks, reduce the onset of neurological complications in adult patients undergoing regional anesthesia techniques?***

**PICO 10 - *Can the preparation of a sterile surgical field (disinfectant, probe covers, gloves, and drapes) for the performance of single-shot peripheral loco-regional techniques help reduce the incidence of infections related to the technique itself?***

**PICO 11 - *Which are the post-procedural monitoring tools for patients undergoing loco-regional techniques?***
